# Supplementary material for: Canted antiferromagnetic behaviours in isostructural Co(ii) and Ni(ii) frameworks with helical lvt topology
Source: Royal Society of Chemistry journal article supplement (doi:10.1039/b923235d), 2010-01-01
Supplement: b923235d.pdf [file b923235d.pdf]

# Canted Antiferromagnetic Behaviors in Isostructural Co(II) and Ni(II) Frameworks with Helical 1vt Topology

Qipu Lin, Jian Zhang, Xinyi Cao, Yuangen Yao\*, Zhaoji Li, Lei Zhang and Zhangfeng Zhou

State Key Laboratory of Structural Chemistry, Fujian Institute of Research on the Structure of Matter, Chinese Academy of Sciences, Fuzhou 350002, P.R. China, yyg@fjirsm.ac.cn

**Table S1.** Crystal Data and Structure Refinements for Complexes **1Co** and **2Ni**.

| Formula                                                                                                  | C <sub>12</sub> H <sub>12</sub> N <sub>8</sub> CoO <sub>3</sub> | C <sub>12</sub> H <sub>12</sub> N <sub>8</sub> NiO <sub>3</sub> |
|----------------------------------------------------------------------------------------------------------|-----------------------------------------------------------------|-----------------------------------------------------------------|
| Formula weight                                                                                           | 375.23                                                          | 374.99                                                          |
| Space group                                                                                              | <i>I4</i> (1)/a(No.88)                                          | <i>I4</i> (1)/a(No.88)                                          |
| <i>a</i> (Å)                                                                                             | 15.6671(2)                                                      | 15.5470(10)                                                     |
| <i>b</i> (Å)                                                                                             | 15.6671(2)                                                      | 15.5470(10)                                                     |
| <i>c</i> (Å)                                                                                             | 12.6333(2)                                                      | 12.4988(13)                                                     |
| $\alpha$ (°)                                                                                             | 90                                                              | 90                                                              |
| $\beta$ (°)                                                                                              | 90                                                              | 90                                                              |
| $\gamma$ (°)                                                                                             | 90                                                              | 90                                                              |
| <i>V</i> (Å <sup>3</sup> )                                                                               | 3100.95(7)                                                      | 3021.1(4)                                                       |
| <i>Z</i>                                                                                                 | 8                                                               | 8                                                               |
| <i>D</i> <sub>calc</sub> (g cm <sup>3</sup> )                                                            | 1.607                                                           | 1.649                                                           |
| $\mu$ (MoK $\alpha$ )(mm <sup>-1</sup> )                                                                 | 1.138                                                           | 1.316                                                           |
| Crystal size(mm)                                                                                         | 0.22×0.16×0.10                                                  | 0.20×0.15×0.10                                                  |
| <i>F</i> (000)                                                                                           | 1528                                                            | 1536                                                            |
| Reflections collected                                                                                    | 8265                                                            | 11479                                                           |
| Independent reflections                                                                                  | 1476(R <sub>int</sub> =0.0307)                                  | 1735 (R <sub>int</sub> =0.0321)                                 |
| Observed data[ <i>I</i> >2 $\sigma$ ( <i>I</i> )]                                                        | 1372                                                            | 1634                                                            |
| Data/restraints/parameters                                                                               | 1476 / 6 / 112                                                  | 1735 / 6 / 112                                                  |
| GOF on <i>F</i> <sup>2</sup>                                                                             | 1.003                                                           | 1.007                                                           |
| <i>R</i> <sub><i>i</i></sub> , w <i>R</i> <sub>2</sub> ( <i>I</i> >2 $\sigma$ ( <i>I</i> )) <sup>a</sup> | 0.0416, 0.0899                                                  | 0.0392, 0.0979                                                  |
| <i>R</i> <sub><i>i</i></sub> , w <i>R</i> <sub>2</sub> (all data) <sup>a</sup>                           | 0.0459, 0.0921                                                  | 0.0416, 0.1000                                                  |

$$^a R_1 = \frac{\sum ||F_o| - |F_c||}{\sum |F_o|}, wR_2 = \left\{ \frac{\sum w[(F_o)^2 - (F_c)^2]^2}{\sum w[(F_o)^2]^2} \right\}^{1/2}.$$

**Table S2.** Important Bond Lengths (Å) and angles (deg) for **1Ni** and **2Co**.

| <b>1Co</b>           |            |                      |            |
|----------------------|------------|----------------------|------------|
| Co(1)-N(1)#1         | 2.109(2)   | Co(1)-O(71)          | 2.161(2)   |
| Co(1)-N(1)           | 2.109(2)   | Co(1)-O(71)#1        | 2.161(2)   |
| Co(1)-N(3)#2         | 2.130(2)   | N(3)-Co(1)#4         | 2.130(2)   |
| Co(1)-N(3)#3         | 2.130(2)   |                      |            |
| N(1)#1-Co(1)-N(1)    | 180.00(10) | N(3)#2-Co(1)-O(71)   | 88.98(9)   |
| N(1)#1-Co(1)-N(3)#2  | 89.39(9)   | N(3)#3-Co(1)-O(71)   | 91.02(9)   |
| N(1)-Co(1)-N(3)#2    | 90.61(9)   | N(1)#1-Co(1)-O(71)#1 | 78.63(8)   |
| N(1)#1-Co(1)-N(3)#3  | 90.61(9)   | N(1)-Co(1)-O(71)#1   | 101.37(8)  |
| N(1)-Co(1)-N(3)#3    | 89.39(9)   | N(3)#2-Co(1)-O(71)#1 | 91.02(9)   |
| N(3)#2-Co(1)-N(3)#3  | 180.0      | N(3)#3-Co(1)-O(71)#1 | 88.98(9)   |
| N(1)#1-Co(1)-O(71)   | 101.37(8)  | O(71)-Co(1)-O(71)#1  | 180.0      |
| N(1)-Co(1)-O(71)     | 78.63(8)   |                      |            |
| <b>2Ni</b>           |            |                      |            |
| Ni(1)-N(1)#1         | 2.0654(18) | Ni(1)-O(71)          | 2.1184(17) |
| Ni(1)-N(1)           | 2.0654(18) | Ni(1)-O(71)#1        | 2.1184(17) |
| Ni(1)-N(3)#2         | 2.1132(18) | N(3)-Ni(1)#4         | 2.1132(18) |
| Ni(1)-N(3)#3         | 2.1132(18) |                      |            |
| N(1)#1-Ni(1)-N(1)    | 180.00(9)  | N(3)#2-Ni(1)-O(71)#1 | 89.36(7)   |
| N(1)#1-Ni(1)-N(3)#2  | 90.74(7)   | N(3)#3-Ni(1)-O(71)#1 | 90.64(7)   |
| N(1)-Ni(1)-N(3)#2    | 89.26(7)   | N(1)#1-Ni(1)-O(71)   | 99.69(7)   |
| N(1)#1-Ni(1)-N(3)#3  | 89.26(7)   | N(1)-Ni(1)-O(71)     | 80.31(7)   |
| N(1)-Ni(1)-N(3)#3    | 90.74(7)   | N(3)#2-Ni(1)-O(71)   | 90.64(7)   |
| N(3)#2-Ni(1)-N(3)#3  | 180.00(9)  | N(3)#3-Ni(1)-O(71)   | 89.36(7)   |
| N(1)#1-Ni(1)-O(71)#1 | 80.31(7)   | O(71)#1-Ni(1)-O(71)  | 180.00(9)  |
| N(1)-Ni(1)-O(71)#1   | 99.69(7)   |                      |            |

Symmetry transformations used to generate equivalent atoms:

**1Co:** #1  $-x+1/2, -y+1/2, -z+1/2$ ; #2  $y+1/4, -x+1/4, z+1/4$ ; #3  $-y+1/4, x+1/4, -z+1/4$ .

**2Ni:** #1  $-x, -y+1, -z$ ; #2  $-y+1/4, x+1/4, -z+1/4$ ; #3  $y-1/4, -x+3/4, z-1/4$ ; #4  $-y+3/4, x+1/4, z+1/4$ .

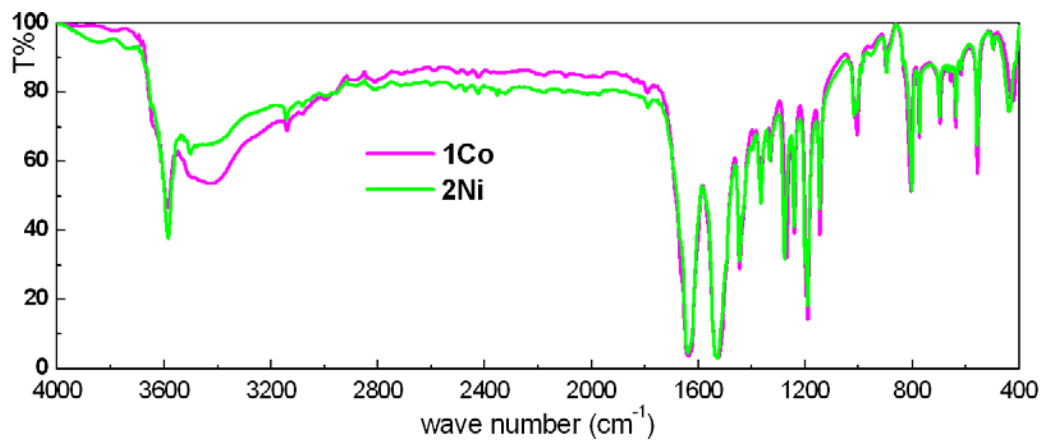

**Figure S1.** IR spectra of **1Co** (magenta), **2Ni** (green).

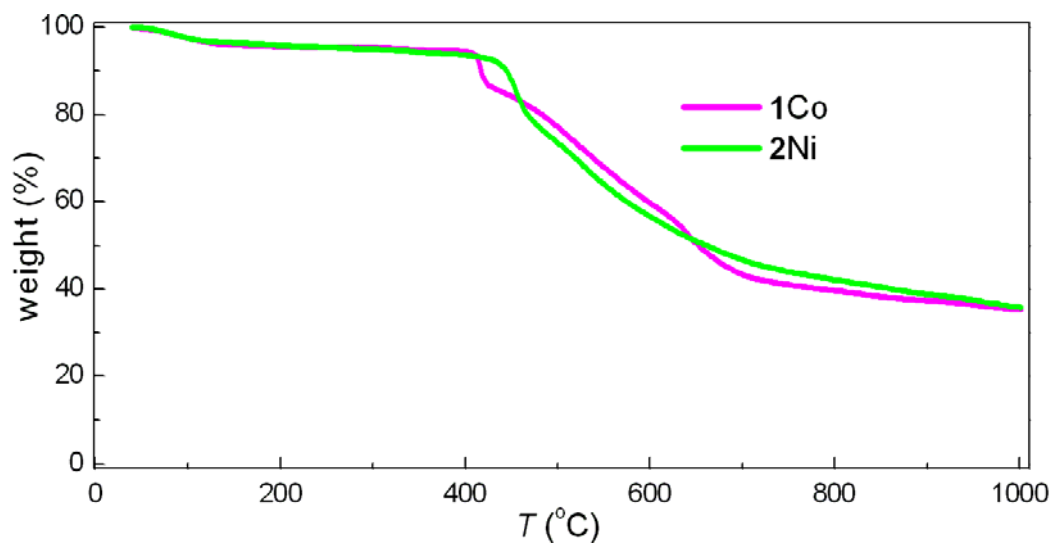

**Figure S2.** The TG curves of **1Co** (magenta), **2Ni** (green).

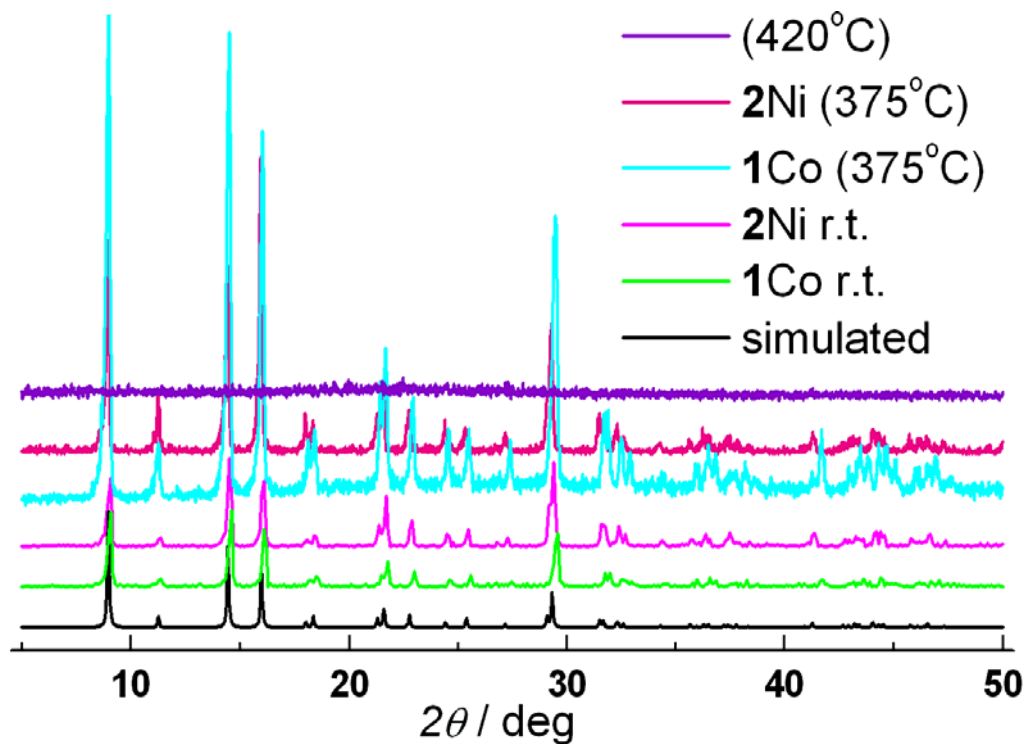

**Figure S3.** Simulated and measured XRD powder patterns for **1Co**, **2Ni** before and after heated to 375 and 420°C, respectively.

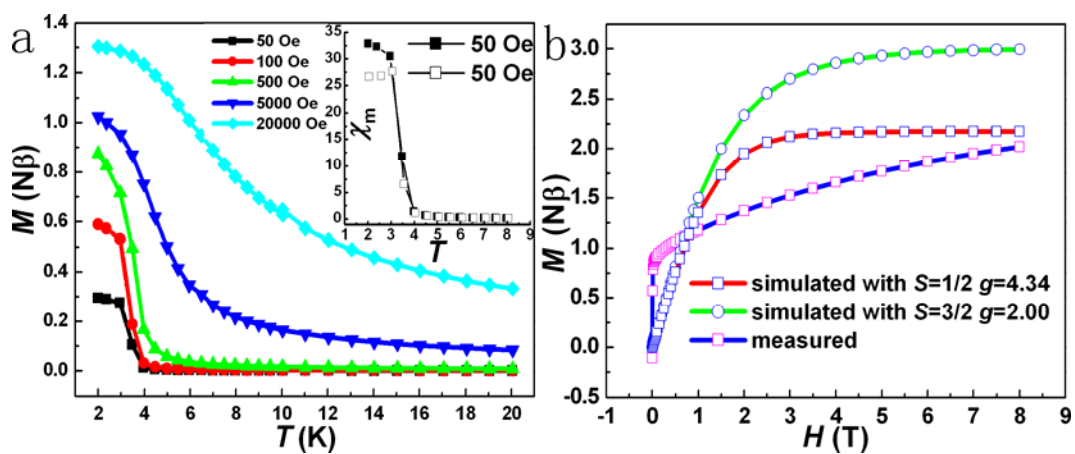

**Figure S4.** left: Plots of  $M$  vs.  $T$  under various fields (inset: FC and ZFC ( $H = 100$  Oe) magnetization); right: Isothermal magnetization (measured and simulated) at 2 K for **1Co**.

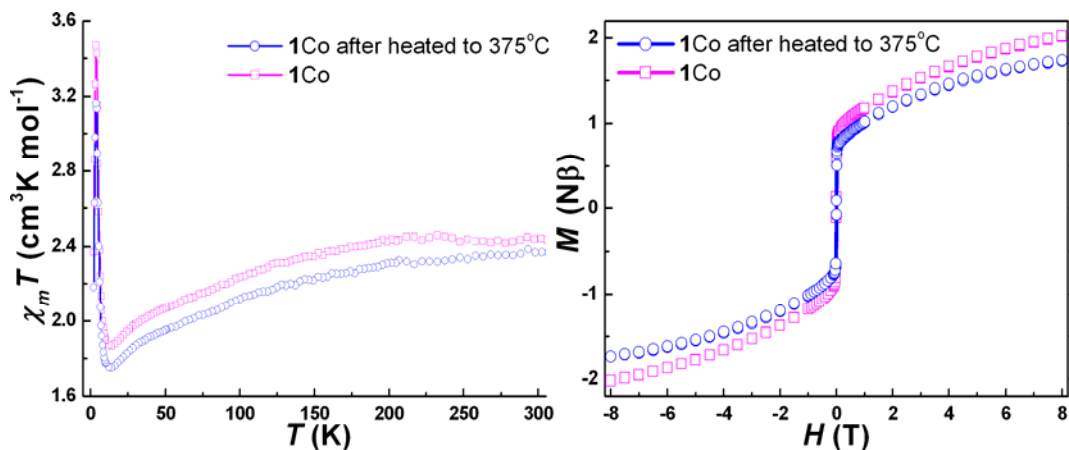

**Figure S5.** left: Plots of  $\chi_m T$  vs.  $T$ ; right: Isothermal magnetization for **1Co** before and after heated to 375°C, respectively.

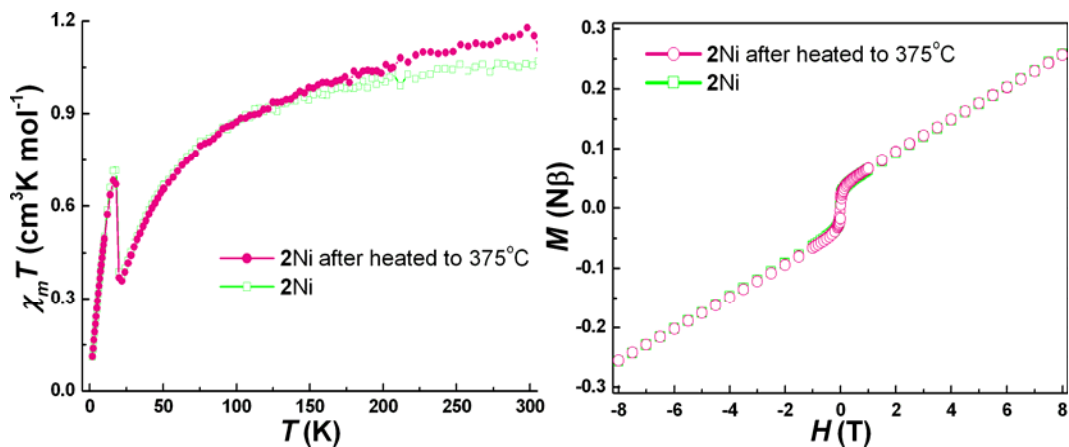

**Figure S6.** left: Plots of  $\chi_m T$  vs.  $T$ ; right: Isothermal magnetization for **2Ni** before and after heated to 375°C, respectively.
